# Supplementary material for: Association between HSPA8 Gene Variants and Ischemic Stroke: A Pilot Study Providing Additional Evidence for the Role of Heat Shock Proteins in Disease Pathogenesis
Source: MDPI journal article supplement (doi:10.3390/genes14061171), 2023-05-27
Supplement: s1 [file s1]

Table S1: Primers and probes were designed for this study

|                         |                                                                                                                                                     |
|-------------------------|-----------------------------------------------------------------------------------------------------------------------------------------------------|
| rs1136141 <i>HSPA8</i>  | 5'- AGAACCCCCAAGCCTCAG -3'<br>5'- GGAAACCGGTCTCATTGAACT -3'<br>5'- FAM-TACCTGGGGTGTAGGCC-RTQ1-3'<br>5'- ROX-TACCTGGGATGTAGGCC-BHQ2-3'               |
| rs1461496 <i>HSPA8</i>  | 5'- CTCGCCTTCATAAACCTTGG -3'<br>5'- TGGATTCCAAAACCATTCGT -3'<br>5'- FAM-TCGCTCAAACATCCA-RTQ1-3'<br>5'- ROX-TCGCTCAGACATCCA-BHQ2-3'                  |
| rs10892958 <i>HSPA8</i> | 5'- CCTTGGACATGGTTGCTGAA -3'<br>5'- CGTGCTTAGACAGGAGGTGA-3'<br>5'- FAM-CCAGGAAAAACGTATGGCCACTGC-RTQ1-3'<br>5'- ROX-CCAGGAAAAAGGTATGGCCACTGC-BHQ2-3' |

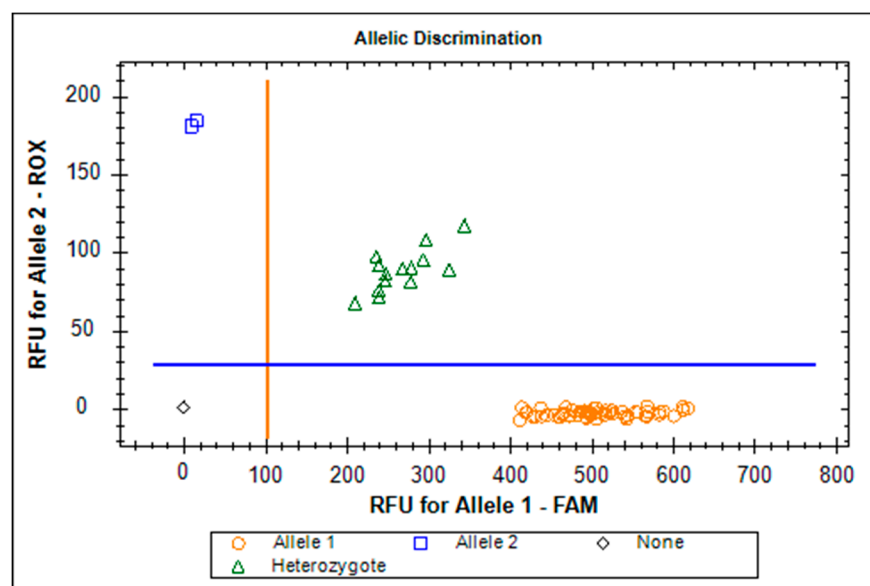

Figure S1: The plot shows clear separation between the signals derived from allele 1 (rs1136141-G, FAM fluorescent dye) or allele 2 (rs1136141-A, ROX fluorescent dye). Genotypes GG, GA, and AA are shown as circles, triangles, and squares, respectively

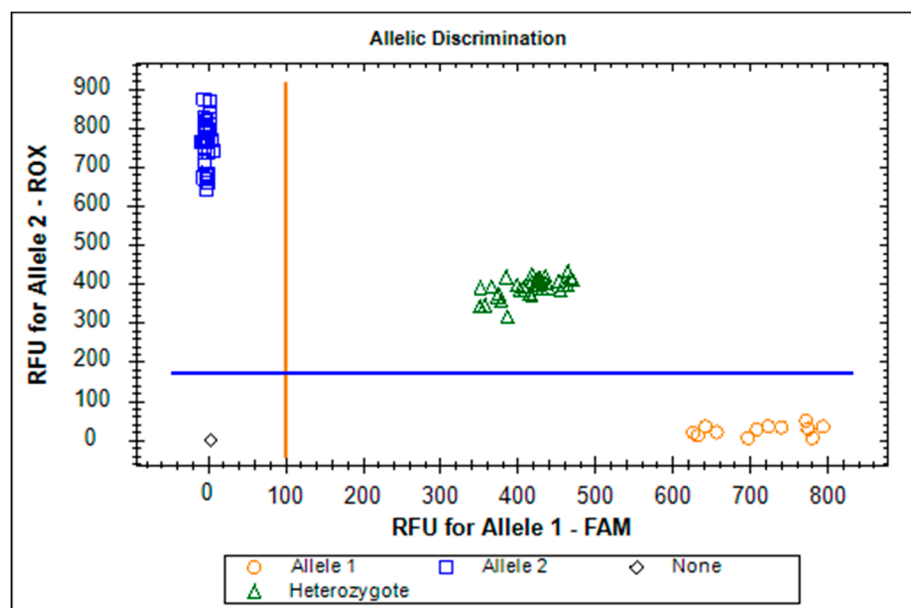

Figure S2: The plot shows clear separation between the signals derived from allele 1 (rs1461496-A, FAM fluorescent dye) or allele 2 (rs1461496-G, ROX fluorescent dye). Genotypes GG, GA, and AA are shown as squares, triangles, and circles, respectively.

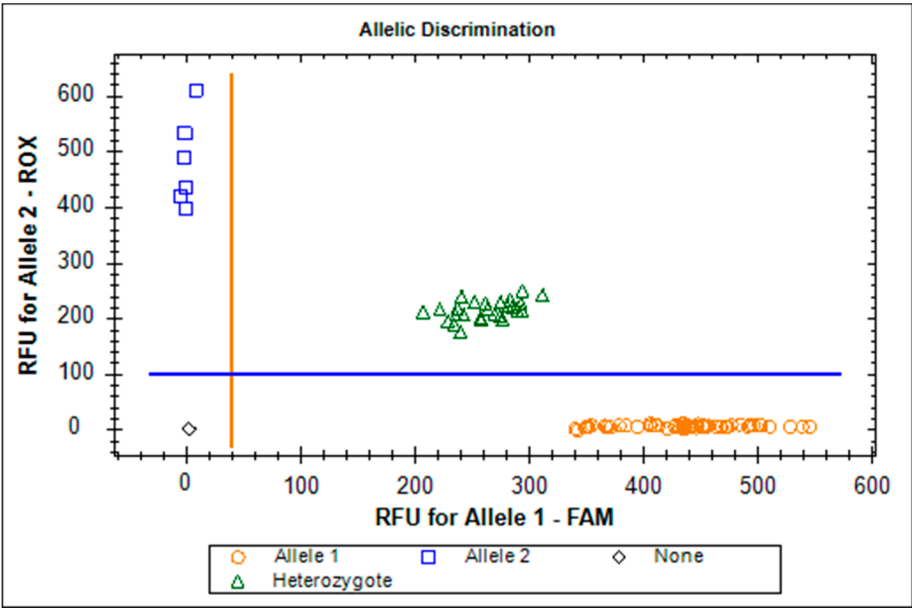

Figure S3: The plot shows clear separation between the signals derived from allele 1 (rs1136141-C, FAM fluorescent dye) or allele 2 (rs1136141-G, ROX fluorescent dye). Genotypes CC, CG, and GG are shown as circles, triangles, and squares, respectively.

Table S2: Main functional characteristics of predicted functional partners of HSPA8 (only experimentally confirmed data)

| Protein | Functions                                                                                                                                                                                                                                                                                                                                                                                                                                                                                             | Score |
|---------|-------------------------------------------------------------------------------------------------------------------------------------------------------------------------------------------------------------------------------------------------------------------------------------------------------------------------------------------------------------------------------------------------------------------------------------------------------------------------------------------------------|-------|
| STIP1   | Stress-induced-phosphoprotein 1; Acts as a co-chaperone for HSP90AA1. Mediates the association of the molecular chaperones HSPA8/HSC70 and HSP90.                                                                                                                                                                                                                                                                                                                                                     | 0.989 |
| BAG1    | Co-chaperone for HSP70 and HSC70 chaperone proteins. Acts as a nucleotide-exchange factor (NEF) promoting the release of ADP from the HSP70 and HSC70 proteins thereby triggering client/substrate protein release. Inhibits the pro-apoptotic function of PPP1R15A, and has anti-apoptotic activity. Markedly increases the anti-cell death function of BCL2 induced by various stimuli.                                                                                                             | 0.988 |
| BAG2    | Co-chaperone for HSP70 and HSC70 chaperone proteins. Acts as a nucleotide-exchange factor (NEF) promoting the release of ADP from the HSP70 and HSC70 proteins thereby triggering client/substrate protein release.                                                                                                                                                                                                                                                                                   | 0.954 |
| STUB1   | E3 ubiquitin-protein ligase which targets misfolded chaperone substrates towards proteasomal degradation. Collaborates with ATXN3 in the degradation of misfolded chaperone substrates. Modulates the activity of several chaperone complexes, including Hsp70, Hsc70 and Hsp90. Acts as a co-chaperone for HSPA1A and HSPA1B chaperone proteins and promotes ubiquitin-mediated protein degradation. Negatively regulates the suppressive function of regulatory T-cells (Treg) during inflammation. | 0.942 |

|                                                                                                         |                                                                                                                                                                                                                                                                                                                                                                                                                                                                                                                                                                                                                                                                                                                                                                                                                                                                                                                                                                          |       |
|---------------------------------------------------------------------------------------------------------|--------------------------------------------------------------------------------------------------------------------------------------------------------------------------------------------------------------------------------------------------------------------------------------------------------------------------------------------------------------------------------------------------------------------------------------------------------------------------------------------------------------------------------------------------------------------------------------------------------------------------------------------------------------------------------------------------------------------------------------------------------------------------------------------------------------------------------------------------------------------------------------------------------------------------------------------------------------------------|-------|
|                                                                                                         | Negatively regulates TGF-beta signaling. May regulate myosin assembly in striated muscles together with UBE4B and VCP/p97.                                                                                                                                                                                                                                                                                                                                                                                                                                                                                                                                                                                                                                                                                                                                                                                                                                               |       |
| HSP90AA1                                                                                                | Molecular chaperone that promotes the maturation, structural maintenance and proper regulation of specific target proteins involved for instance in cell cycle control and signal transduction. Undergoes a functional cycle that is linked to its ATPase activity which is essential for its chaperone activity. Engages with a range of client protein classes via its interaction with various co-chaperone proteins or complexes, that act as adapters, simultaneously able to interact with the specific client and the central chaperone itself. Plays a critical role in mitochondrial import, delivers preproteins to the mitochondrial import receptor TOMM70. Apart from its chaperone activity, it also plays a role in the regulation of the transcription machinery. HSP90 and its co-chaperones modulate transcription. Antagonizes STUB1-mediated inhibition of TGF-beta signaling via inhibition of STUB1-mediated SMAD3 ubiquitination and degradation. | 0.936 |
| BAG3                                                                                                    | Co-chaperone for HSP70 and HSC70 chaperone proteins. Acts as a nucleotide-exchange factor (NEF) promoting the release of ADP from the HSP70 and HSC70 proteins thereby triggering client/substrate protein release. Has anti-apoptotic activity. Plays a role in the HSF1 nucleocytoplasmic transport.                                                                                                                                                                                                                                                                                                                                                                                                                                                                                                                                                                                                                                                                   | 0.915 |
| HSPA4                                                                                                   | Predicted to enable ATP binding activity. Involved in chaperone-mediated protein complex assembly and protein insertion into mitochondrial outer membrane. Located in cytosol and extracellular exosome.                                                                                                                                                                                                                                                                                                                                                                                                                                                                                                                                                                                                                                                                                                                                                                 | 0.911 |
| HSPBP1                                                                                                  | Inhibits HSPA1A chaperone activity by changing the conformation of the ATP-binding domain of HSPA1A and interfering with ATP binding. Interferes with ubiquitination mediated by STUB1 and inhibits chaperone-assisted degradation of immature CFTR.                                                                                                                                                                                                                                                                                                                                                                                                                                                                                                                                                                                                                                                                                                                     | 0.898 |
| LRRK2                                                                                                   | Serine/threonine-protein kinase which phosphorylates a broad range of proteins involved in multiple processes such as neuronal plasticity, autophagy, and vesicle trafficking. Is a key regulator of RAB GTPases by regulating the GTP/GDP exchange and interaction partners of RABs through phosphorylation. Regulates neuronal process morphology in the intact central nervous system (CNS). Plays a role in synaptic vesicle trafficking. Positively regulates autophagy through a calcium-dependent activation of the CaMKK/AMPK signaling pathway.                                                                                                                                                                                                                                                                                                                                                                                                                 | 0.888 |
| DNAJA1                                                                                                  | Co-chaperone for HSPA8/Hsc70. Plays a role in protein transport into mitochondria via its role as co-chaperone. Functions as co-chaperone for HSPA1B and negatively regulates the translocation of BAX from the cytosol to mitochondria in response to cellular stress, thereby protecting cells against apoptosis.                                                                                                                                                                                                                                                                                                                                                                                                                                                                                                                                                                                                                                                      | 0.885 |
| Data from the STRING database is shown.<br>* - Proven interaction mechanisms based only on experiments. |                                                                                                                                                                                                                                                                                                                                                                                                                                                                                                                                                                                                                                                                                                                                                                                                                                                                                                                                                                          |       |

Table S3: Functional enrichments of HSPA8 network (only experimentally confirmed data)

| No                                   | Term ID    | Term Description             | Observed Gene Count | Background Gene Count | Strength | FDR                   |
|--------------------------------------|------------|------------------------------|---------------------|-----------------------|----------|-----------------------|
| Biological processes (Gene Ontology) |            |                              |                     |                       |          |                       |
| 1                                    | GO:0006457 | Protein folding              | 7                   | 213                   | 1.77     | 8.40×10 <sup>-8</sup> |
| 2                                    | GO:0061684 | Chaperone-mediated autophagy | 4                   | 8                     | 2.95     | 1.71×10 <sup>-7</sup> |
| 3                                    | GO:0006986 | Response to unfolded protein | 6                   | 166                   | 1.81     | 8.04×10 <sup>-7</sup> |

|                                         |            |                                                                                  |   |      |      |                       |
|-----------------------------------------|------------|----------------------------------------------------------------------------------|---|------|------|-----------------------|
| 4                                       | GO:1900034 | Regulation of cellular response to heat                                          | 6 | 79   | 2.13 | 1.50×10 <sup>-6</sup> |
| 5                                       | GO:0031396 | Regulation of protein ubiquitination                                             | 4 | 212  | 1.53 | 1.68×10 <sup>-6</sup> |
| 6                                       | GO:0031647 | Regulation of protein stability                                                  | 5 | 293  | 1.48 | 8.40×10 <sup>-6</sup> |
| 7                                       | GO:1903364 | Positive regulation of cellular protein catabolic process                        | 5 | 161  | 1.74 | 2.61×10 <sup>-5</sup> |
| 8                                       | GO:1903748 | Negative regulation of establishment of protein localization to mitochondrion    | 3 | 9    | 2.77 | 3.72×10 <sup>-5</sup> |
| 9                                       | GO:0031331 | Positive regulation of cellular catabolic process                                | 6 | 397  | 1.43 | 3.72×10 <sup>-5</sup> |
| 10                                      | GO:0080135 | Regulation of cellular response to stress                                        | 7 | 739  | 1.23 | 3.72×10 <sup>-5</sup> |
| 11                                      | GO:0070585 | Protein localization to mitochondrion                                            | 4 | 81   | 1.94 | 9.51×10 <sup>-5</sup> |
| 12                                      | GO:0031329 | Regulation of cellular catabolic process                                         | 5 | 875  | 1.01 | 9.51×10 <sup>-5</sup> |
| 13                                      | GO:0009408 | Response to heat                                                                 | 4 | 101  | 1.85 | 1.70×10 <sup>-4</sup> |
| 14                                      | GO:0006914 | Autophagy                                                                        | 6 | 270  | 1.52 | 1.70×10 <sup>-4</sup> |
| 15                                      | GO:1901800 | Positive regulation of proteasomal protein catabolic process                     | 4 | 122  | 1.77 | 3.00×10 <sup>-4</sup> |
| 16                                      | GO:0045040 | Protein insertion into mitochondrial outer membrane                              | 2 | 4    | 2.95 | 0.002                 |
| 17                                      | GO:0034605 | Cellular response to heat                                                        | 3 | 60   | 1.95 | 0.002                 |
| 18                                      | GO:0050790 | Regulation of catalytic activity                                                 | 7 | 2386 | 0.72 | 0.002                 |
| 19                                      | GO:1903215 | Negative regulation of protein targeting to mitochondrion                        | 2 | 7    | 2.71 | 0.004                 |
| 20                                      | GO:0072321 | Chaperone-mediated protein transport                                             | 2 | 11   | 2.51 | 0.008                 |
| 21                                      | GO:0032436 | Positive regulation of proteasomal ubiquitin-dependent protein catabolic process | 3 | 100  | 1.73 | 0.008                 |
| 22                                      | GO:0032091 | Negative regulation of protein binding                                           | 3 | 106  | 1.7  | 0.009                 |
| 23                                      | GO:0033365 | Protein localization to organelle                                                | 5 | 743  | 1.08 | 0.010                 |
| 24                                      | GO:0010033 | Response to organic substance                                                    | 8 | 3011 | 0.67 | 0.011                 |
| 25                                      | GO:0031398 | Positive regulation of protein ubiquitination                                    | 3 | 126  | 1.63 | 0.013                 |
| 26                                      | GO:0034620 | Cellular response to unfolded protein                                            | 3 | 129  | 1.62 | 0.014                 |
| 27                                      | GO:0042026 | Protein refolding                                                                | 2 | 18   | 2.3  | 0.016                 |
| 28                                      | GO:0017038 | Protein import                                                                   | 3 | 144  | 1.57 | 0.018                 |
| 29                                      | GO:0051131 | Chaperone-mediated protein complex assembly                                      | 2 | 21   | 2.23 | 0.018                 |
| 30                                      | GO:0072594 | Establishment of protein localization to organelle                               | 4 | 433  | 1.22 | 0.018                 |
| 31                                      | GO:0032880 | Regulation of protein localization                                               | 5 | 934  | 0.98 | 0.022                 |
| 32                                      | GO:0034613 | Cellular protein localization                                                    | 6 | 1610 | 0.82 | 0.023                 |
| 33                                      | GO:0006886 | Intracellular protein transport                                                  | 5 | 999  | 0.95 | 0.027                 |
| 34                                      | GO:0051085 | Chaperone cofactor-dependent protein refolding                                   | 2 | 29   | 2.09 | 0.028                 |
| 35                                      | GO:0050821 | Protein stabilization                                                            | 3 | 186  | 1.46 | 0.029                 |
| 36                                      | GO:0051338 | Regulation of transferase activity                                               | 5 | 1036 | 0.93 | 0.030                 |
| 37                                      | GO:0038128 | ERBB2 signaling pathway                                                          | 2 | 32   | 2.05 | 0.032                 |
| 38                                      | GO:1903827 | Regulation of cellular protein localization                                      | 4 | 568  | 1.1  | 0.039                 |
| 39                                      | GO:0044092 | Negative regulation of molecular function                                        | 5 | 1163 | 0.88 | 0.046                 |
| 40                                      | GO:0051223 | Regulation of protein transport                                                  | 4 | 617  | 1.06 | 0.049                 |
| Data from the STRING database is shown. |            |                                                                                  |   |      |      |                       |

Table S4: Distribution of *HSPA8* genotypes in ischemic stroke patients/healthy controls and their correspondence to the Hardy-Weinberg equilibrium

| SNPs      | Genotypes | Controls    | $H_o (H_e)^1$ | P <sup>2</sup> | IS patients | $H_o (H_e)^3$ | P <sup>4</sup> |
|-----------|-----------|-------------|---------------|----------------|-------------|---------------|----------------|
| rs1461496 | G/G       | 496 (39.8%) | 0.4691        | >0.05          | 335 (37.8%) | 0.4972        | >0.05          |
|           | G/A       | 584 (46.9%) | (0.4647)      |                | 441 (49.7%) | (0.4681)      |                |

|                                                                                                                                                                                                                                                   |     |             |                    |       |             |                    |       |
|---------------------------------------------------------------------------------------------------------------------------------------------------------------------------------------------------------------------------------------------------|-----|-------------|--------------------|-------|-------------|--------------------|-------|
|                                                                                                                                                                                                                                                   | A/A | 165 (13.2%) |                    |       | 111 (12.5%) |                    |       |
| rs10892958                                                                                                                                                                                                                                        | C/C | 803 (64.2%) | 0.3144<br>(0.3205) | >0.05 | 521 (58.7%) | 0.3694<br>(0.3527) | >0.05 |
|                                                                                                                                                                                                                                                   | C/G | 393 (31.4%) |                    |       | 328 (36.9%) |                    |       |
|                                                                                                                                                                                                                                                   | G/G | 54 (4.3%)   |                    |       | 39 (4.4%)   |                    |       |
|                                                                                                                                                                                                                                                   |     |             |                    |       |             |                    |       |
| rs1136141                                                                                                                                                                                                                                         | G/G | 893 (75.5%) | 0.2234<br>(0.2304) | >0.05 | 623 (74%)   | 0.2280<br>(0.2495) | <0.05 |
|                                                                                                                                                                                                                                                   | A/G | 264 (22.3%) |                    |       | 192 (22.8%) |                    |       |
|                                                                                                                                                                                                                                                   | A/A | 25 (2.1%)   |                    |       | 27 (3.2%)   |                    |       |
|                                                                                                                                                                                                                                                   |     |             |                    |       |             |                    |       |
| <sup>1</sup> – observed (Ho) and expected (He) heterozygosity in healthy controls; <sup>2</sup> – P-HWE in healthy controls;<br><sup>3</sup> – observed (Ho) and expected (He) heterozygosity in IS patients; <sup>4</sup> – P-HWE in IS patients |     |             |                    |       |             |                    |       |

Table S5: Distribution of *HSPA8* genotypes in subgroups analysis of patients/healthy controls

| SNP        | Genotypes                                                                         | Controls    | IS patients | Controls                                                                       | IS patients |
|------------|-----------------------------------------------------------------------------------|-------------|-------------|--------------------------------------------------------------------------------|-------------|
|            | Males<br>(controls (N=577)/IS patients (N=481))                                   |             |             | Females<br>(controls (N=674)/IS patients (N=407))                              |             |
| rs1461496  | G/G                                                                               | 232 (40.4%) | 178 (37%)   | 264 (39.4%)                                                                    | 157 (38.7%) |
|            | G/A                                                                               | 260 (45.2%) | 247 (51.4%) | 324 (48.4%)                                                                    | 194 (47.8%) |
|            | A/A                                                                               | 83 (14.4%)  | 56 (11.6%)  | 82 (12.2%)                                                                     | 55 (13.6%)  |
|            | Maf (A)                                                                           | 0.370       | 0.373       | 0.364                                                                          | 0.374       |
| rs10892958 | C/C                                                                               | 375 (65.1%) | 276 (57.4%) | 428 (63.5%)                                                                    | 245 (60.2%) |
|            | C/G                                                                               | 179 (31.1%) | 182 (37.8%) | 214 (31.8%)                                                                    | 146 (35.9%) |
|            | G/G                                                                               | 22 (3.8%)   | 23 (4.8%)   | 32 (4.8%)                                                                      | 16 (3.9%)   |
|            | Maf (G)                                                                           | 0.194       | 0.237       | 0.206                                                                          | 0.219       |
| rs1136141  | G/G                                                                               | 415 (75.9%) | 341 (75.4%) | 478 (75.3%)                                                                    | 282 (72.3%) |
|            | A/G                                                                               | 124 (22.7%) | 98 (21.7%)  | 140 (22.1%)                                                                    | 94 (24.1%)  |
|            | A/A                                                                               | 8 (1.5%)    | 13 (2.9%)   | 17 (2.7%)                                                                      | 14 (3.6%)   |
|            | Maf (A)                                                                           | 0.128       | 0.137       | 0.137                                                                          | 0.156       |
|            | Nonsmokers (f-)<br>(controls (N=920)/IS patients (N=463))                         |             |             | Smokers (f+)<br>(controls (N=331)/IS patients (N=425))                         |             |
| rs1461496  | G/G                                                                               | 378 (41.2%) | 174 (37.7%) | 118 (36%)                                                                      | 161 (37.9%) |
|            | G/A                                                                               | 430 (46.9%) | 229 (49.6%) | 154 (47%)                                                                      | 212 (49.9%) |
|            | A/A                                                                               | 109 (11.9%) | 59 (12.8%)  | 56 (17.1%)                                                                     | 52 (12.2%)  |
|            | Maf (A)                                                                           | 0.353       | 0.376       | 0.405                                                                          | 0.372       |
| rs10892958 | C/C                                                                               | 583 (63.4%) | 280 (60.5%) | 220 (66.7%)                                                                    | 241 (56.7%) |
|            | C/G                                                                               | 298 (32.4%) | 167 (36.1%) | 95 (28.8%)                                                                     | 161 (37.9%) |
|            | G/G                                                                               | 39 (4.2%)   | 16 (3.5%)   | 15 (4.5%)                                                                      | 23 (5.4%)   |
|            | Maf (G)                                                                           | 0.204       | 0.215       | 0.189                                                                          | 0.244       |
| rs1136141  | G/G                                                                               | 640 (73.8%) | 336 (76.5%) | 253 (80.3%)                                                                    | 287 (71.2%) |
|            | A/G                                                                               | 205 (23.6%) | 95 (21.6%)  | 59 (18.7%)                                                                     | 97 (24.1%)  |
|            | A/A                                                                               | 22 (2.5%)   | 8 (1.8%)    | 3 (1%)                                                                         | 19 (4.7%)   |
|            | Maf (A)                                                                           | 0.144       | 0.126       | 0.103                                                                          | 0.167       |
|            | Normal fruit and vegetable intake (f-)<br>(controls (N=1251)/IS patients (N=395)) |             |             | Low fruit and vegetable intake (f+)<br>(controls (N=1251)/IS patients (N=449)) |             |
| rs1461496  | G/G                                                                               | 496 (39.8%) | 152 (38.6%) | 496 (39.8%)                                                                    | 163 (36.3%) |
|            | G/A                                                                               | 584 (46.9%) | 192 (48.7%) | 584 (46.9%)                                                                    | 229 (51%)   |
|            | A/A                                                                               | 165 (13.2%) | 50 (12.7%)  | 165 (13.2%)                                                                    | 57 (12.7%)  |
|            | Maf (A)                                                                           | 0.367       | 0.371       | 0.367                                                                          | 0.382       |
| rs10892958 | C/C                                                                               | 803 (64.2%) | 250 (63.3%) | 803 (64.2%)                                                                    | 243 (54.1%) |
|            | C/G                                                                               | 393 (31.4%) | 128 (32.4%) | 393 (31.4%)                                                                    | 184 (41%)   |

|           |         |             |             |             |             |
|-----------|---------|-------------|-------------|-------------|-------------|
|           | G/G     | 54 (4.3%)   | 17 (4.3%)   | 54 (4.3%)   | 22 (4.9%)   |
|           | Maf (G) | 0.200       | 0.205       | 0.200       | 0.254       |
| rs1136141 | G/G     | 893 (75.5%) | 296 (78.5%) | 893 (75.5%) | 300 (70.4%) |
|           | A/G     | 264 (22.3%) | 70 (18.6%)  | 264 (22.3%) | 110 (25.8%) |
|           | A/A     | 25 (2.1%)   | 11 (2.9%)   | 25 (2.1%)   | 16 (3.8%)   |
|           | Maf (A) | 0.133       | 0.122       | 0.133       | 0.167       |

Table S6: Analysis of the effect of rs10892958 *HSPA8* on binding of DNA to transcription factors

| Nº | Ref/<br>SNP<br>allele <sup>1</sup> | TF <sup>2</sup> | GAIN<br>/LOSS <sup>3</sup> | Motif <sup>4</sup> | P-Value<br>SNP<br>impact <sup>5</sup> | P-Value<br>Ref <sup>6</sup> | P-Value<br>SNP <sup>7</sup> |
|----|------------------------------------|-----------------|----------------------------|--------------------|---------------------------------------|-----------------------------|-----------------------------|
| 1  | C/G                                | AP1             | gain                       | AP1_disc9          | 0                                     | 0.040                       | 0.361                       |
| 2  | C/G                                | OLIG1           | gain                       | OLIG1_1            | 0.001                                 | 0.001                       | 0.200                       |
| 3  | C/G                                | CDC5L           | gain                       | CDC5L_1            | 0.001                                 | 0.010                       | 0.239                       |
| 4  | C/G                                | NEUROG2         | gain                       | NEUROG2_2          | 0.002                                 | 0.002                       | 0.112                       |
| 5  | C/G                                | OLIG3           | gain                       | OLIG3_1            | 0.002                                 | 0.001                       | 0.065                       |
| 6  | C/G                                | FOXO4           | gain                       | FOXO4_3            | 0.003                                 | 0.012                       | 0.482                       |
| 7  | C/G                                | OLIG2           | gain                       | OLIG2_1            | 0.003                                 | 0.001                       | 0.056                       |
| 8  | C/G                                | FOXD3           | gain                       | FOXD3_2            | 0.005                                 | 0.009                       | 0.099                       |
| 9  | C/G                                | CENPB           | gain                       | CENPB_1            | 0.006                                 | 0.015                       | 0.369                       |
| 10 | C/G                                | FOXA1           | gain                       | FOXA1_1            | 0.006                                 | 0.033                       | 0.553                       |
| 11 | C/G                                | HES5            | gain                       | HES5_1             | 0.007                                 | 0.021                       | 0.279                       |
| 12 | C/G                                | RUNX3           | gain                       | RUNX3_3            | 0.009                                 | 0.013                       | 0.159                       |
| 13 | C/G                                | ARNT            | gain                       | ARNT_3             | 0.010                                 | 0.024                       | 0.386                       |
| 14 | C/G                                | USF1            | gain                       | USF1_1             | 0.010                                 | 0.025                       | 0.273                       |
| 15 | C/G                                | USF             | gain                       | USF_1              | 0.011                                 | 0.039                       | 0.396                       |
| 16 | C/G                                | HDAC2           | gain                       | HDAC2_disc2        | 0.012                                 | 0.019                       | 0.257                       |
| 17 | C/G                                | FOXD2           | gain                       | FOXD2_1            | 0.015                                 | 0.041                       | 0.372                       |
| 18 | C/G                                | BARHL2          | gain                       | BARHL2_2           | 0.015                                 | 0.017                       | 0.280                       |
| 19 | C/G                                | HLF             | gain                       | HLF_4              | 0.016                                 | 0.026                       | 0.342                       |
| 20 | C/G                                | MYC::MAX        | gain                       | MYC::MAX_2         | 0.017                                 | 0.047                       | 0.460                       |
| 21 | C/G                                | ERG             | gain                       | AP1_disc9          | 0.000                                 | 0.040                       | 0.361                       |
| 22 | C/G                                | IRF             | gain                       | OLIG1_1            | 0.001                                 | 0.001                       | 0.200                       |
| 23 | C/G                                | IRF2            | gain                       | CDC5L_1            | 0.001                                 | 0.010                       | 0.239                       |
| 24 | C/G                                | MYC::MAX        | gain                       | NEUROG2_2          | 0.002                                 | 0.002                       | 0.112                       |
| 25 | C/G                                | HOMEZ           | gain                       | OLIG3_1            | 0.002                                 | 0.001                       | 0.065                       |
| 26 | C/G                                | FOXO6           | gain                       | FOXO4_3            | 0.003                                 | 0.012                       | 0.482                       |
| 27 | C/G                                | SP2             | gain                       | OLIG2_1            | 0.003                                 | 0.001                       | 0.056                       |
| 28 | C/G                                | SIX3            | gain                       | FOXD3_2            | 0.005                                 | 0.009                       | 0.099                       |
| 29 | C/G                                | E4F1            | gain                       | CENPB_1            | 0.006                                 | 0.015                       | 0.369                       |
| 30 | C/G                                | MYBL2           | gain                       | FOXA1_1            | 0.006                                 | 0.033                       | 0.553                       |
| 31 | C/G                                | FOXD2           | gain                       | HES5_1             | 0.007                                 | 0.021                       | 0.279                       |
| 32 | C/G                                | SPI1            | loss                       | SPI1_disc3         | 0                                     | 0.200                       | 0                           |
| 33 | C/G                                | EN1             | loss                       | EN1_2              | 0                                     | 0.675                       | 0                           |
| 34 | C/G                                | PPARG           | loss                       | PPARG_4            | 3.8×10 <sup>-4</sup>                  | 0.474                       | 0.011                       |
| 35 | C/G                                | PPARG::RXRA     | loss                       | MA0065.2           | 0.001                                 | 0.426                       | 0.011                       |
| 36 | C/G                                | IRF             | loss                       | IRF_disc4          | 0.002                                 | 0.426                       | 0.015                       |
| 37 | C/G                                | BDP1            | loss                       | BDP1_disc3         | 0.002                                 | 0.316                       | 0.031                       |
| 38 | C/G                                | REL             | loss                       | REL_2              | 0.003                                 | 0.424                       | 0.015                       |

|    |                |                                                                                                                                                                                                                                                                                                                                                                                 |      |              |                      |       |       |
|----|----------------|---------------------------------------------------------------------------------------------------------------------------------------------------------------------------------------------------------------------------------------------------------------------------------------------------------------------------------------------------------------------------------|------|--------------|----------------------|-------|-------|
| 39 | C/G            | ZNF784                                                                                                                                                                                                                                                                                                                                                                          | loss | ZNF784_1     | 0.003                | 0.624 | 0.015 |
| 40 | C/G            | ZEB1                                                                                                                                                                                                                                                                                                                                                                            | loss | ZEB1_disc1   | 0.003                | 0.237 | 0.011 |
| 41 | C/G            | IRF1                                                                                                                                                                                                                                                                                                                                                                            | loss | IRF1_2       | 0.003                | 0.277 | 0.017 |
| 42 | C/G            | Sox3                                                                                                                                                                                                                                                                                                                                                                            | loss | MA0514.1     | 0.003                | 0.186 | 0.012 |
| 43 | C/G            | NFIC                                                                                                                                                                                                                                                                                                                                                                            | loss | NFIC_1       | 0.004                | 0.170 | 0.027 |
| 44 | C/G            | TEAD1                                                                                                                                                                                                                                                                                                                                                                           | loss | TEAD1_3      | 0.004                | 0.527 | 0.013 |
| 45 | C/G            | TEAD1                                                                                                                                                                                                                                                                                                                                                                           | loss | TEAD1_1      | 0.005                | 0.286 | 0.011 |
| 46 | C/G            | KLF4                                                                                                                                                                                                                                                                                                                                                                            | loss | KLF4_1       | 0.005                | 0.482 | 0.046 |
| 47 | C/G            | TATA                                                                                                                                                                                                                                                                                                                                                                            | loss | TATA_disc4   | 0.006                | 0.099 | 0.006 |
| 48 | C/G            | SOX2                                                                                                                                                                                                                                                                                                                                                                            | loss | SOX2_1       | 0.006                | 0.079 | 0.006 |
| 49 | C/G            | ESRRA                                                                                                                                                                                                                                                                                                                                                                           | loss | ESRRA_6      | 0.006                | 0.302 | 0.044 |
| 50 | C/G            | EP300                                                                                                                                                                                                                                                                                                                                                                           | loss | EP300_disc10 | 0.007                | 0.126 | 0.011 |
| 51 | C/G            | CACD                                                                                                                                                                                                                                                                                                                                                                            | loss | CACD_1       | 0.007                | 0.278 | 0.046 |
| 52 | C/G            | IRF8                                                                                                                                                                                                                                                                                                                                                                            | loss | IRF8_3       | 0.008                | 0.476 | 0.033 |
| 53 | C/G            | Sox6                                                                                                                                                                                                                                                                                                                                                                            | loss | MA0515.1     | 0.008                | 0.165 | 0.012 |
| 54 | C/G            | KLF7                                                                                                                                                                                                                                                                                                                                                                            | loss | KLF7_1       | 0.008                | 0.421 | 0.048 |
| 55 | C/G            | Klf4                                                                                                                                                                                                                                                                                                                                                                            | loss | MA0039.2     | 0.009                | 0.453 | 0.049 |
| 56 | C/G            | Sox2                                                                                                                                                                                                                                                                                                                                                                            | loss | MA0143.3     | 0.011                | 0.187 | 0.025 |
| 57 | C/G            | RARG                                                                                                                                                                                                                                                                                                                                                                            | loss | RARG_5       | 0.011                | 0.526 | 0.047 |
| 58 | C/G            | HLTF                                                                                                                                                                                                                                                                                                                                                                            | loss | HLTF_1       | 0.014                | 0.190 | 0.013 |
| 59 | C/G            | En1                                                                                                                                                                                                                                                                                                                                                                             | loss | MA0027.1     | 0.014                | 0.386 | 0.022 |
| 60 | C/G            | YY1                                                                                                                                                                                                                                                                                                                                                                             | loss | YY1_disc1    | 0.014                | 0.326 | 0.034 |
| 61 | C/G            | Klf1                                                                                                                                                                                                                                                                                                                                                                            | loss | MA0493.1     | 0.016                | 0.339 | 0.032 |
| 62 | C/G            | MYC::MAX                                                                                                                                                                                                                                                                                                                                                                        | loss | SP1_disc3    | 0                    | 0.200 | 0     |
| 63 | C/G            | NANOG                                                                                                                                                                                                                                                                                                                                                                           | loss | EN1_2        | 0                    | 0.675 | 0     |
| 64 | C/G            | PRDM1                                                                                                                                                                                                                                                                                                                                                                           | loss | PPARG_4      | 3.8×10 <sup>-4</sup> | 0.474 | 0.011 |
| 65 | C/G            | AP1                                                                                                                                                                                                                                                                                                                                                                             | loss | MA0065.2     | 0.001                | 0.426 | 0.011 |
| 66 | C/G            | Foxd3                                                                                                                                                                                                                                                                                                                                                                           | loss | IRF_disc4    | 0.002                | 0.426 | 0.015 |
| 67 | C/G            | FOXD3                                                                                                                                                                                                                                                                                                                                                                           | loss | BDP1_disc3   | 0.002                | 0.316 | 0.031 |
| 68 | C/G            | IKZF3                                                                                                                                                                                                                                                                                                                                                                           | loss | REL_2        | 0.003                | 0.424 | 0.015 |
| 69 | C/G            | TAL1::TCF3                                                                                                                                                                                                                                                                                                                                                                      | loss | ZNF784_1     | 0.003                | 0.624 | 0.015 |
| 70 | C/G            | GMEB2                                                                                                                                                                                                                                                                                                                                                                           | loss | ZEB1_disc1   | 0.003                | 0.237 | 0.011 |
| 71 | C/G            | CLOCK                                                                                                                                                                                                                                                                                                                                                                           | loss | IRF1_2       | 0.003                | 0.277 | 0.017 |
| 72 | C/G            | MYBL1                                                                                                                                                                                                                                                                                                                                                                           | loss | MA0514.1     | 0.003                | 0.186 | 0.012 |
| 73 | C/G            | CREB3L1                                                                                                                                                                                                                                                                                                                                                                         | loss | NFIC_1       | 0.004                | 0.170 | 0.027 |
| 74 | C/G            | MYBL2                                                                                                                                                                                                                                                                                                                                                                           | loss | TEAD1_3      | 0.004                | 0.527 | 0.013 |
| 75 | C/G            | MYB                                                                                                                                                                                                                                                                                                                                                                             | loss | TEAD1_1      | 0.005                | 0.286 | 0.011 |
| 76 | C/G            | FLI1                                                                                                                                                                                                                                                                                                                                                                            | loss | KLF4_1       | 0.005                | 0.482 | 0.046 |
| 77 | C/G            | IRF7                                                                                                                                                                                                                                                                                                                                                                            | loss | TATA_disc4   | 0.006                | 0.099 | 0.006 |
| 78 | C/G            | NFKB                                                                                                                                                                                                                                                                                                                                                                            | loss | SOX2_1       | 0.006                | 0.079 | 0.006 |
| 79 | C/G            | SNAI2                                                                                                                                                                                                                                                                                                                                                                           | loss | ESRRA_6      | 0.006                | 0.302 | 0.044 |
| 80 | C/G            | IRF1                                                                                                                                                                                                                                                                                                                                                                            | loss | EP300_disc10 | 0.007                | 0.126 | 0.011 |
| 81 | C/G            | SCRT1                                                                                                                                                                                                                                                                                                                                                                           | loss | CACD_1       | 0.007                | 0.278 | 0.046 |
| 82 | C/G            | SOX8                                                                                                                                                                                                                                                                                                                                                                            | loss | IRF8_3       | 0.008                | 0.476 | 0.033 |
| 83 | C/G            | HNF4                                                                                                                                                                                                                                                                                                                                                                            | loss | MA0515.1     | 0.008                | 0.165 | 0.012 |
| 84 | C/G            | GMEB2                                                                                                                                                                                                                                                                                                                                                                           | loss | KLF7_1       | 0.008                | 0.421 | 0.048 |
|    | G <sup>8</sup> | regulation of transcription from RNA polymerase II promoter in response to oxidative stress (GO:0043619; FDR=0.02);<br>glial cell fate commitment (GO:0021781; FDR=0.04);<br>regulation of oligodendrocyte differentiation (GO:0048713; FDR=0.01);<br>neuron fate commitment (GO:0048663; FDR=0.0009);<br>negative regulation of neuron differentiation (GO:0045665; FDR=0.04); |      |              |                      |       |       |

|                                                                                                                                                                                                                                                                                                                                                                                                                                                                                                                                                                                                                                                                                                                                                                                                                                                                                                                                                                                                       |                |                                                                                                                                                                                                                                                                                                                                                                                                                                  |
|-------------------------------------------------------------------------------------------------------------------------------------------------------------------------------------------------------------------------------------------------------------------------------------------------------------------------------------------------------------------------------------------------------------------------------------------------------------------------------------------------------------------------------------------------------------------------------------------------------------------------------------------------------------------------------------------------------------------------------------------------------------------------------------------------------------------------------------------------------------------------------------------------------------------------------------------------------------------------------------------------------|----------------|----------------------------------------------------------------------------------------------------------------------------------------------------------------------------------------------------------------------------------------------------------------------------------------------------------------------------------------------------------------------------------------------------------------------------------|
|                                                                                                                                                                                                                                                                                                                                                                                                                                                                                                                                                                                                                                                                                                                                                                                                                                                                                                                                                                                                       |                | oligodendrocyte differentiation (GO:0048709; FDR=0.04)                                                                                                                                                                                                                                                                                                                                                                           |
|                                                                                                                                                                                                                                                                                                                                                                                                                                                                                                                                                                                                                                                                                                                                                                                                                                                                                                                                                                                                       | C <sup>9</sup> | macrophage derived foam cell differentiation (GO:0010742; FDR=0.0149);<br>glial cell fate commitment (GO:0021781; FDR=0.03);<br>negative regulation of interferon-beta production (GO:0032688; FDR=0.035);<br>cellular response to transforming growth factor beta stimulus (GO:0071560; FDR=0.02);<br>cellular response to cytokine stimulus (GO:0071345; FDR=0.008);<br>regulation of apoptotic process (GO:0042981; FDR=0.01) |
| 1 – reference (Ref) / alternative (SNP) allele;<br>2 – TF - transcription factor;<br>3 – binding of TF to the reference (LOSS) / alternative (GAIN) allele;<br>4 – binding sites with high affinity for TF;<br>5 – p value statistically confirming the potential gain or loss of function of the genomic region with SNP in terms of transcription factor binding;<br>6 – p-value for assessing the binding of TF to the Ref allele;<br>7 – p-value for assessing the binding of TF to the SNP allele;<br>8 – biological processes pathogenetically significant for IS, in which TFs that bind to the alternative allele are jointly involved (data from the Gene Ontology resource; <a href="http://geneontology.org/">http://geneontology.org/</a> );<br>9 – biological processes pathogenetically significant for AI, in which TFs that bind to an reference allele are jointly involved (data from the Gene Ontology resource; <a href="http://geneontology.org/">http://geneontology.org/</a> ) |                |                                                                                                                                                                                                                                                                                                                                                                                                                                  |

Table S7: Analysis of the effect of rs1136141 *HSPA8* on binding of DNA to transcription factors

| No | Ref/<br>SNP<br>allele <sup>1</sup> | TF <sup>2</sup> | GAIN<br>/LOSS <sup>3</sup> | Motif <sup>4</sup> | P-Value<br>SNP<br>impact <sup>5</sup> | P-Value<br>Ref <sup>6</sup> | P-Value<br>SNP <sup>7</sup> |
|----|------------------------------------|-----------------|----------------------------|--------------------|---------------------------------------|-----------------------------|-----------------------------|
| 1  | G/A                                | PAX4            | gain                       | PAX4_1             | 1.2×10 <sup>-6</sup>                  | 5.9×10 <sup>-6</sup>        | 0.165                       |
| 2  | G/A                                | HEY1            | gain                       | HEY1_disc2         | 4.5×10 <sup>-5</sup>                  | 0.001                       | 0.307                       |
| 3  | G/A                                | PAX4            | gain                       | PAX4_3             | 0.001                                 | 0.008                       | 0.958                       |
| 4  | G/A                                | RREB1           | gain                       | RREB1_1            | 0.001                                 | 0.019                       | 0.184                       |
| 5  | G/A                                | GLIS1           | gain                       | GLIS1_1            | 0.002                                 | 0.024                       | 0.535                       |
| 6  | G/A                                | KLF4            | gain                       | KLF4_1             | 0.002                                 | 0.005                       | 0.085                       |
| 7  | G/A                                | RUNX2           | gain                       | RUNX2_6            | 0.003                                 | 0.021                       | 0.467                       |
| 8  | G/A                                | RREB1           | gain                       | RREB1_2            | 0.003                                 | 0.041                       | 0.184                       |
| 9  | G/A                                | KLF16           | gain                       | KLF16_1            | 0.003                                 | 0.026                       | 0.454                       |
| 10 | G/A                                | EBF1            | gain                       | EBF1_1             | 0.004                                 | 0.011                       | 0.077                       |
| 11 | G/A                                | TATA            | gain                       | TATA_disc4         | 0.004                                 | 0.005                       | 0.088                       |
| 12 | G/A                                | Klf4            | gain                       | MA0039.2           | 0.004                                 | 0.007                       | 0.089                       |
| 13 | G/A                                | NR2C2           | gain                       | NR2C2_disc3        | 0.005                                 | 0.012                       | 0.138                       |
| 14 | G/A                                | TBX5            | gain                       | TBX5_1             | 0.005                                 | 0.015                       | 0.319                       |
| 15 | G/A                                | IRF             | gain                       | IRF_disc4          | 0.005                                 | 0.029                       | 0.415                       |
| 16 | G/A                                | NR2F2           | gain                       | NR2F2_1            | 0.005                                 | 0.034                       | 0.207                       |
| 17 | G/A                                | SP1             | gain                       | SP1_7              | 0.007                                 | 0.015                       | 0.224                       |
| 18 | G/A                                | EBF1            | gain                       | EBF1_4             | 0.008                                 | 0.009                       | 0.100                       |
| 19 | G/A                                | KLF5            | gain                       | MA0599.1           | 0.009                                 | 0.003                       | 0.058                       |
| 20 | G/A                                | PPARA           | gain                       | PPARA_1            | 0.011                                 | 0.012                       | 0.059                       |
| 21 | G/A                                | TBX1            | gain                       | TBX1_1             | 0.012                                 | 0.027                       | 0.213                       |
| 22 | G/A                                | ZNF281          | gain                       | ZNF281_1           | 0.012                                 | 0.038                       | 0.228                       |
| 23 | G/A                                | RUNX3           | gain                       | RUNX3_4            | 0.012                                 | 0.033                       | 0.436                       |
| 24 | G/A                                | RUNX1           | gain                       | RUNX1_7            | 0.013                                 | 0.035                       | 0.376                       |
| 25 | G/A                                | EGR1            | gain                       | EGR1_disc6         | 0.015                                 | 0.023                       | 0.217                       |
| 26 | G/A                                | EGR1            | gain                       | EGR1_disc5         | 0.017                                 | 0.033                       | 0.156                       |
| 27 | G/A                                | RUNX3           | gain                       | RUNX3_2            | 0.018                                 | 0.029                       | 0.389                       |



|    |                |                                                                                                                                                                                                                                                                                                                                                                          |      |            |                      |                      |       |
|----|----------------|--------------------------------------------------------------------------------------------------------------------------------------------------------------------------------------------------------------------------------------------------------------------------------------------------------------------------------------------------------------------------|------|------------|----------------------|----------------------|-------|
| 28 | G/A            | WT1                                                                                                                                                                                                                                                                                                                                                                      | gain | WT1_1      | 0.018                | 0.041                | 0.263 |
| 29 | G/A            | SP1                                                                                                                                                                                                                                                                                                                                                                      | gain | SP1_2      | 0.018                | 0.029                | 0.188 |
| 30 | G/A            | RUNX1                                                                                                                                                                                                                                                                                                                                                                    | gain | RUNX1_9    | 0.019                | 0.044                | 0.445 |
| 31 | G/A            | CTCF                                                                                                                                                                                                                                                                                                                                                                     | gain | CTCF_disc6 | 0.019                | 0.007                | 0.087 |
| 32 | G/A            | ATF3                                                                                                                                                                                                                                                                                                                                                                     | gain | ATF3_disc3 | 0.021                | 0.031                | 0.276 |
| 33 | G/A            | SP1                                                                                                                                                                                                                                                                                                                                                                      | gain | SP1_4      | 0.026                | 0.031                | 0.173 |
| 34 | G/A            | KLF12                                                                                                                                                                                                                                                                                                                                                                    | gain | KLF12_2    | 0.028                | 0.024                | 0.149 |
| 35 | G/A            | EGR3                                                                                                                                                                                                                                                                                                                                                                     | gain | EGR3_3     | 0.031                | 0.024                | 0.119 |
| 36 | G/A            | KLF7                                                                                                                                                                                                                                                                                                                                                                     | gain | PAX4_1     | 1.2×10 <sup>-6</sup> | 5.9×10 <sup>-6</sup> | 0.165 |
| 37 | G/A            | RREB1                                                                                                                                                                                                                                                                                                                                                                    | gain | HEY1_disc2 | 4.5×10 <sup>-5</sup> | 0.001                | 0.307 |
| 38 | G/A            | ELF5                                                                                                                                                                                                                                                                                                                                                                     | gain | PAX4_3     | 0.001                | 0.008                | 0.958 |
| 39 | G/A            | GLIS2                                                                                                                                                                                                                                                                                                                                                                    | gain | RREB1_1    | 0.001                | 0.019                | 0.184 |
| 40 | G/A            | ETS1                                                                                                                                                                                                                                                                                                                                                                     | gain | GLIS1_1    | 0.002                | 0.024                | 0.535 |
| 41 | G/A            | TFAP2                                                                                                                                                                                                                                                                                                                                                                    | gain | KLF4_1     | 0.002                | 0.005                | 0.085 |
| 42 | G/A            | E4F1                                                                                                                                                                                                                                                                                                                                                                     | gain | RUNX2_6    | 0.003                | 0.021                | 0.467 |
| 43 | G/A            | SP1                                                                                                                                                                                                                                                                                                                                                                      | gain | RREB1_2    | 0.003                | 0.041                | 0.184 |
| 44 | G/A            | TEAD1                                                                                                                                                                                                                                                                                                                                                                    | loss | MA0090.1   | 1.5×10 <sup>-4</sup> | 0.108                | 0.007 |
| 45 | G/A            | FEV                                                                                                                                                                                                                                                                                                                                                                      | loss | FEV_1      | 0.001                | 0.169                | 0.006 |
| 46 | G/A            | EGR1                                                                                                                                                                                                                                                                                                                                                                     | loss | EGR1_disc4 | 0.001                | 0.094                | 0.014 |
| 47 | G/A            | TEAD1                                                                                                                                                                                                                                                                                                                                                                    | loss | TEAD1_2    | 0.002                | 0.086                | 0.005 |
| 48 | G/A            | IKZF2                                                                                                                                                                                                                                                                                                                                                                    | loss | IKZF2_1    | 0.005                | 0.519                | 0.024 |
| 49 | G/A            | TEAD1                                                                                                                                                                                                                                                                                                                                                                    | loss | TEAD1_1    | 0.006                | 0.144                | 0.006 |
| 50 | G/A            | CREB1                                                                                                                                                                                                                                                                                                                                                                    | loss | CREB1_8    | 0.007                | 0.517                | 0.021 |
| 51 | G/A            | E2F1                                                                                                                                                                                                                                                                                                                                                                     | loss | E2F1_10    | 0.009                | 0.306                | 0.020 |
| 52 | G/A            | TEAD3                                                                                                                                                                                                                                                                                                                                                                    | loss | TEAD3_2    | 0.009                | 0.284                | 0.019 |
| 53 | G/A            | STAT                                                                                                                                                                                                                                                                                                                                                                     | loss | STAT_disc1 | 0.009                | 0.313                | 0.039 |
| 54 | G/A            | Stat5a::Stat5b                                                                                                                                                                                                                                                                                                                                                           | loss | MA0519.1   | 0.010                | 0.195                | 0.017 |
| 55 | G/A            | TEAD1                                                                                                                                                                                                                                                                                                                                                                    | loss | TEAD1_3    | 0.011                | 0.264                | 0.014 |
| 56 | G/A            | GATA2                                                                                                                                                                                                                                                                                                                                                                    | loss | GATA2_2    | 0.019                | 0.238                | 0.019 |
| 57 | G/A            | IKZF1                                                                                                                                                                                                                                                                                                                                                                    | loss | IKZF1_1    | 0.020                | 0.360                | 0.047 |
| 58 | G/A            | NFATC1                                                                                                                                                                                                                                                                                                                                                                   | loss | NFATC1_3   | 0.026                | 0.128                | 0.023 |
| 59 | G/A            | ETS                                                                                                                                                                                                                                                                                                                                                                      | loss | MA0090.1   | 1.5×10 <sup>-4</sup> | 0.108                | 0.007 |
| 60 | G/A            | ZNF524                                                                                                                                                                                                                                                                                                                                                                   | loss | FEV_1      | 0.001                | 0.169                | 0.006 |
| 61 | G/A            | ZNF589                                                                                                                                                                                                                                                                                                                                                                   | loss | EGR1_disc4 | 0.001                | 0.094                | 0.014 |
| 62 | G/A            | BCL                                                                                                                                                                                                                                                                                                                                                                      | loss | TEAD1_2    | 0.002                | 0.086                | 0.005 |
|    | A <sup>8</sup> | positive regulation of CD8-positive, alpha-beta T cell differentiation (GO:0043378; FDR=0.007);<br>regulation of blood vessel endothelial cell migration (GO:0043535; FDR=0.04);<br>positive regulation of angiogenesis (GO:0045766; FDR=0.02);<br>response to growth factor (GO:0070848; FDR=0.015);<br>negative regulation of apoptotic process (GO:0043066; FDR=0.04) |      |            |                      |                      |       |
|    | G <sup>9</sup> | -                                                                                                                                                                                                                                                                                                                                                                        |      |            |                      |                      |       |

1 – reference (Ref) / alternative (SNP) allele;

2 – TF - transcription factor;

3 – binding of TF to the reference (LOSS) / alternative (GAIN) allele;

4 – binding sites with high affinity for TF;

5 – p value statistically confirming the potential gain or loss of function of the genomic region with SNP in terms of transcription factor binding;

6 – p-value for assessing the binding of TF to the Ref allele;

7 – p-value for assessing the binding of TF to the SNP allele;

8 – biological processes pathogenetically significant for IS, in which TFs that bind to the alternative allele are jointly involved (data from the Gene Ontology resource; <http://geneontology.org/>);

9 – biological processes pathogenetically significant for AI, in which TFs that bind to an reference allele are jointly involved (data from the Gene Ontology resource; <http://geneontology.org/>)
